# Supplementary material
Source: PubMed Central journal article supplement (PMC3879632)
Supplement: supp_M113.031682_mcp.M113.031682-1.pdf [file supp_M113.031682_mcp.M113.031682-1.pdf]

**Fig. S1. Representative figure of HCV stem loop RNAs.** HCV RNA consists of several stem loop structures in the 5' UTR. Most of the stem loop structures were identified as internal ribosomal entry site for HCV replication in the host cells. In this study, we used stem loop I (SL1) as one of the important stem loop structures that contributes to HCV replication to study HCV RNA-host protein interaction. To show the specificity, we also used stem loop III<sub>d</sub> (SL3<sub>d</sub>) as a control.
