# Supplementary material
Source: PubMed Central journal article supplement (PMC3879632)
Supplement: supp_M113.031682_mcp.M113.031682-3.pdf [file supp_M113.031682_mcp.M113.031682-3.pdf]

| siRNAs   | Duplex sequences                                                                                             | Location region/Exon |
|----------|--------------------------------------------------------------------------------------------------------------|----------------------|
| ZSCAN20  | rGrGrArArUrUrGrCrArUrArCrArGrArArGrArArCrCrA G G<br>rGrArCrCrUrUrArArCrGrUrArUrGrUrCrUrCrUrCrUrGrUrCrC       | CDS/3                |
| hnRNPK   | rGrArCrUrArGrUrGrArArGrArArCrUrGrArArGrGrArGrU C C<br>rUrUrCrUrGrArUrCrArCrUrUrCrUrUrGrArCrUrUrCrCrUrCrArGrG | 3'UTR/17             |
| ZBED1    | rArGrCrArCrArGrArArUrGrUrUrArUrCrCrUrUrArCrGrU C C<br>rCrGrUrCrGrUrGrUrCrUrUrArCrArArUrArGrGrArArUrGrCrArGrG | NA/NA                |
| DDEF1    | rGrGrArArArCrArCrGrArGrCrUrCrCrArArUrGrArGrGrU C A<br>rArCrCrCrUrUrUrGrUrGrCrUrCrGrArGrGrUrUrArCrUrCrCrArGrU | CDS/15               |
| FKBP8    | rArCrCrUrUrCrCrArArArGrArArCrGrArUrCrCrArCrG C A<br>rCrUrUrGrGrArArGrGrUrUrGrUrUrCrUrGrCrUrArGrGrUrGrCrGrU   | CDS/7-8              |
| HTATIP   | rGrGrArUrGrCrArGrArArUrArArArUrCrCrGrUrCrUrUrU A T<br>rGrUrCrCrUrArCrGrUrCrUrUrArUrUrUrArGrGrCrArGrArArUrA   | CDS/2                |
| NPM1     | rCrGrCrUrUrGrCrGrCrArGrGrArCrGrGrCrUrArCrGrGrU A C<br>rUrCrGrCrGrArArCrGrCrGrUrCrCrUrGrCrCrGrArUrGrCrCrArUrG | NA/1                 |
| VPS37A   | rArCrArArCrUrCrArCrArGrArUrArUrGrArArUrGrArArC A A<br>rArGrUrGrUrUrGrArGrUrGrUrCrUrArUrArCrUrUrArCrUrUrGrUrU | CDS/6                |
| HFE      | rGrArGrUrUrGrArArCrCrUrArArArCrArUrArGrArArArU T G<br>rCrUrCrUrCrArArCrUrUrGrGrArUrUrUrGrUrArUrGrUrUrUrArArC | 3'UTR/6              |
| PPARA    | rArCrCrArUrGrUrArArCrArArArUrArCrCrUrCrArGrCrA G G<br>rCrCrUrGrGrUrArCrArUrUrGrUrUrArUrGrGrArGrUrCrGrUrCrC   | 3'UTR/8              |
| KIAA0020 | rArGrArGrUrArArArGrUrUrArArUrGrArGrUrGrArUrUrU G C<br>rUrUrUrCrUrCrArUrUrUrCrArArUrUrArCrUrCrArCrUrArArArCrG | CDS/5                |
| YWHAE    | rGrCrArUrCrUrArArGrArGrArGrArGrUrUrArArUrCrA C A<br>rUrUrCrGrUrArGrArUrUrCrUrCrUrCrUrCrCrArArUrUrArGrUrGrU   | 3'UTR/6              |

NA: not provided by IDT
